# Supplementary figures and images for: Characterization of Immune Cell Subsets of Tumor Infiltrating Lymphocytes in Brain Metastases
Source: MDPI journal article supplement (doi:10.3390/biology10050425), 2021-05-11

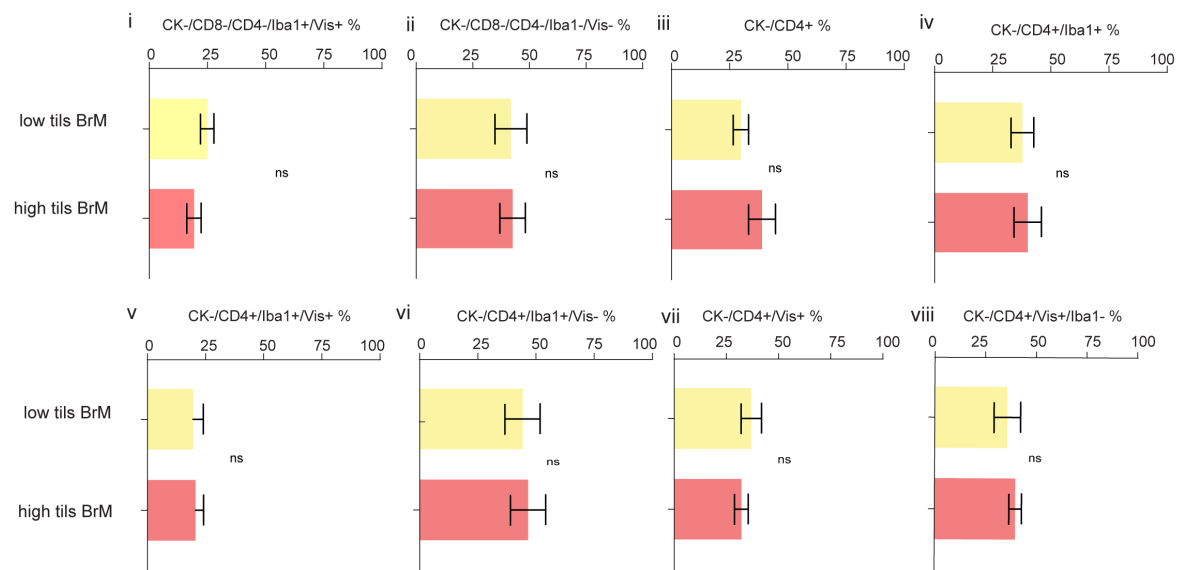

**Figure S1.** Quantified bar graphs of other cytokeratin negative and CD4+ subsets within the groups.

Supplement: s1 [file s1]
